# Supplementary material
Source: publisher figshare collection journal article supplement (https://acs.figshare.com/ndownloader/files/5060713)
Supplement: Supplementary file 1 [file 5060713]

Supporting Information:

Table 1: Characteristics of the 6MAP-containing oligonucleotides

| Sequence name | Local environment <sup>1</sup> | SS Quantum Yield <sup>2</sup> | Duplex Quantum Yield <sup>2</sup> | $\Delta T_m$ (°C) <sup>3</sup> | $\Delta\Delta H$ (kcal/mole) <sup>4</sup> |
|---------------|--------------------------------|-------------------------------|-----------------------------------|--------------------------------|-------------------------------------------|
| A3-5          | AFA                            | 0.017                         | 0.013                             | 5.7                            | 5.5                                       |
| A4-8          | AFA                            | 0.043                         | 0.010                             | 5.9                            | 5.2                                       |
| T3-8          | AFA                            | 0.022                         | 0.012                             | 0.7                            | 5.5                                       |
| T4-12         | AFA                            | 0.040                         | 0.004                             | 2.3                            | 5.0                                       |
| A3-6          | AFT                            | 0.036                         | 0.019                             | 2.2                            | 3.6                                       |
| A4-9          | AFT                            | 0.051                         | 0.008                             | 2.5                            | 3.4                                       |
| A4-19         | AFT                            | 0.079                         | 0.014                             | 2.7                            | 3.0                                       |
| T3-7          | TFA                            | 0.033                         | 0.027                             | 7.8                            | 3.4                                       |
| T4-13         | AFC                            | 0.068                         | 0.020                             | 2.0                            | 2.4                                       |
| AT-6          | TFT                            | 0.039                         | 0.015                             | 1.1                            | 2.5                                       |
| AT-12         | TFT                            | 0.030                         | 0.010                             | 2.8                            | 1.8                                       |

<sup>1</sup>Sequences are reported in the 5' to 3' direction. <sup>2</sup>Measured relative to 6MAP monomer, which has a quantum yield of 0.34 relative to quinine sulfate (*I*). <sup>3</sup>Determined by UV absorption:  $\Delta T_m = T_{mControl} - T_{m6MAP\ sequence}$  <sup>4</sup>Determined from fits to the UV melting profiles as described in the Materials and Methods:  $\Delta\Delta H = \Delta H_{Control} - \Delta H_{6MAP\ sequence}$ .

Figure 1:

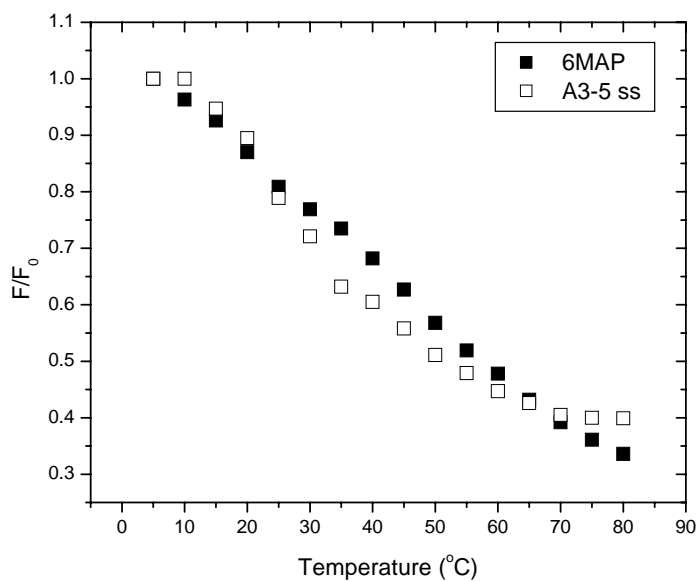

Figure 1: Fluorescence intensity of the 6MAP monomer and the A3-5 oligonucleotide as a function of temperature. Similar behavior is observed for the other 6MAP containing oligonucleotides. Fluorescence intensity is shown referenced to the first point ( $F_0$ ). In general, the fluorescence intensity decreases linearly with increasing temperature.

Figure 2:

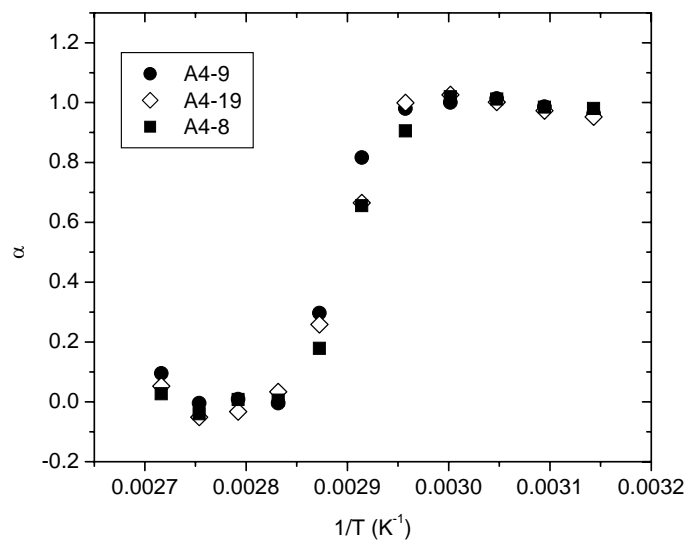

Figure 2: Fraction of single strands in the duplex state ( $\alpha$ ) as a function of temperature for the A4-8 (■), A4-9 (●) and A4-19 (◇) duplexes. The duplex  $T_m$ s of all three duplexes are  $71 \pm 1$  °C. Measurements were performed in 0.3 M NaCl with 0.05 M  $Mg^{2+}$  in a 10 mM Tris buffer at pH 7.4.

Figure 3:

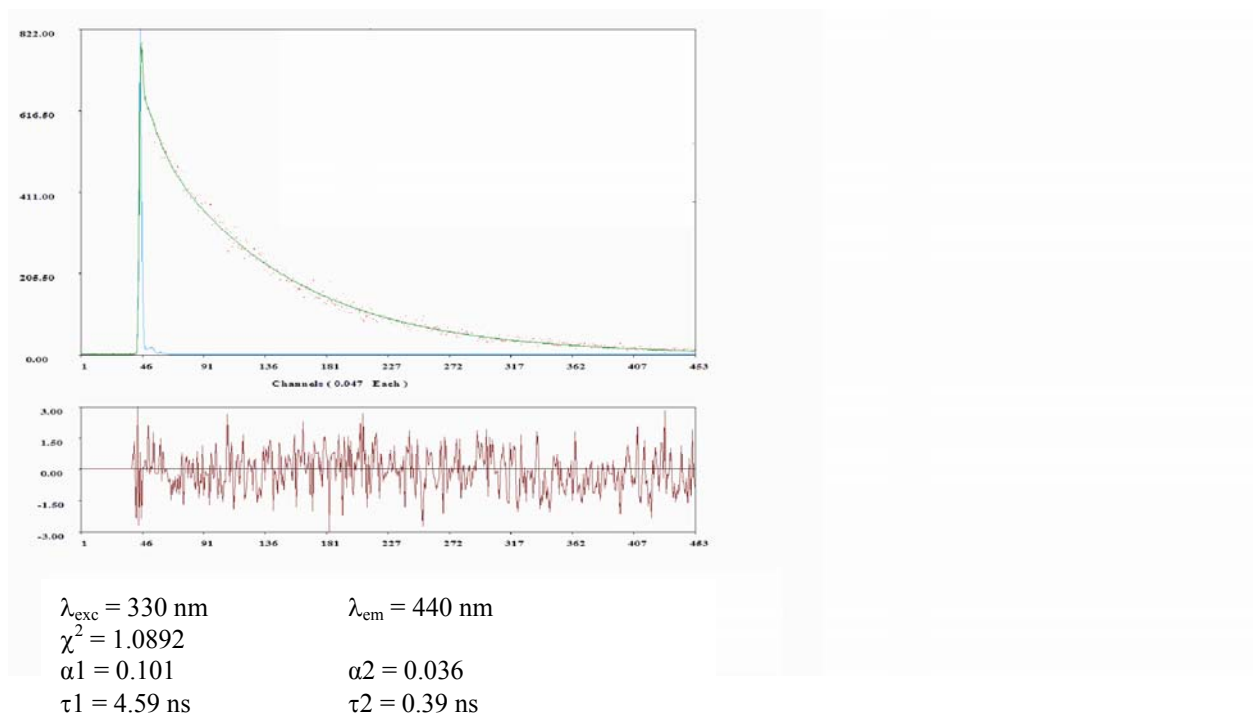

Figure 3: Representative fluorescence decay and fit. Fluorescence decay of the A3-5 duplex (dots) with associated fit (green solid line) and instrument response function (blue). Residuals derived from the fit are shown in brown underneath. Fluorescence decay was fit to a sum of exponentials (2) and fitting parameters are shown in the figure. Similar decays and fits were obtained for the other dodecamer duplexes.

Figure 4:

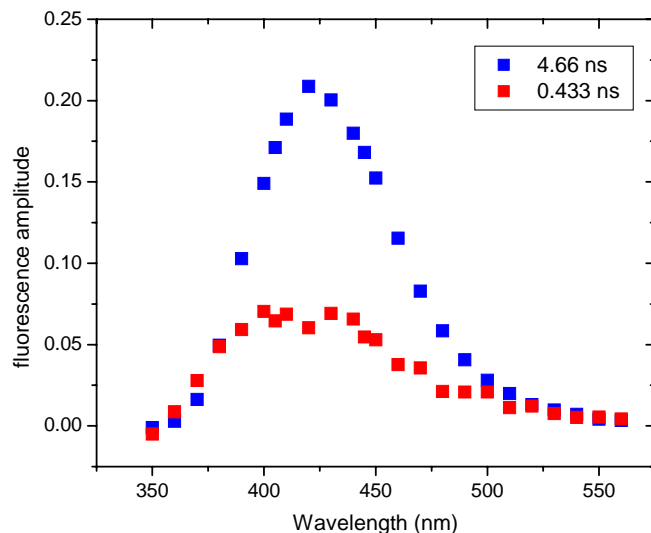

Figure 4: Decay-associated spectrum derived from the simultaneous global analysis of fluorescence decays (shown above) of the A3-5 duplex. Global analysis of the fluorescence decays was performed as described (2). The decay-associated spectrum illustrates that the 0.433 ns component peaks at shorter wavelength relative to the 4.66 ns component.

- (1) Hawkins, M. E., Pfeleiderer, W., Jungmann, O., and Balis, F. M. (2001) Synthesis and Fluorescence Characterization of Pteridine Adenosine Nucleoside Analogs for DNA Incorporation. *Anal. Biochem.* 298, 231-240.
- (2) Knutson, J. R., Beechem, J. M., and Brand, L. (1983) Simultaneous Analysis of Multiple Fluorescence Decay Curves: A Global Approach. *Chem. Phys. Lett.* 102, 501-507.
